# Supplementary material for: Immune Response to an Inactivated Vaccine of SARS-CoV-2 (CoronaVac) in an Indigenous Brazilian Population: A Cohort Study
Source: MDPI journal article supplement (doi:10.3390/vaccines12040402), 2024-04-10
Supplement: s1 [file s1]

**Supplementary table 1.** Evaluation of the immune response of individuals previously exposed to the virus.

| <b>Cellular Immune Response</b> | <b>95% CI</b>         | <b>P Value</b> | <b>Adjusted P Value*</b> |
|---------------------------------|-----------------------|----------------|--------------------------|
| T CD4+ lymphocytes              | 65.97 (64.84 - 67.09) | 0.0020*        | 0.0187*                  |
| T CD8+ lymphocytes              | 20.45 (19.37 - 21.52) | 0.3510         | 1.0000                   |
| T regulatory cells              | 48.56 (46.89 - 50.22) | 0.4300         | 1.0000                   |
| T lymphocytes                   | 63.29 (62.07 - 64.51) | 0.6480         | 1.0000                   |
| T CD4 memory cells              | 48.56 (46.89 - 50.22) | 0.6700         | 1.0000                   |
| B memory cells                  | 4.36 (3.89 - 4.84)    | 0.4680         | 1.0000                   |
| Non-classical monocyte          | 7.20 (6.01 - 8.39)    | 0.4830         | 1.0000                   |
| Intermediate monocyte           | 5.84 (4.99 - 6.69)    | 0.5750         | 1.0000                   |
| Classical monocytes             | 7.70 (6.98 - 8.44)    | 0.9610         | 1.0000                   |
| B lymphocytes                   | 11.74 (10.79 - 12.69) | 0.6010         | 1.0000                   |
| Natural killer cells            | 17.66 (16.73 - 18.60) | 0.7160         | 1.0000                   |

The pre and post-vaccination immune response metrics of individuals previously exposed to SARS-CoV-2 were used. 95% CI: 95% confidence interval. The significance level adopted for all analyses was set at <0.05. The p-values were obtained after Dunn's correction.
